# Supplementary material for: Quality of information on the Internet for Korean patients with inflammatory bowel disease
Source: PubMed Central journal article supplement — Korean J Intern Med. 2018 Oct 1;34(6):1215–22. doi: 10.3904/kjim.2018.019 (PMC6823559; doi:10.3904/kjim.2018.019), 2018-10-01
Supplement: kjim-2018-019-suppl2.pdf [file kjim-2018-019-suppl2.pdf]

**Supplementary Table 2. The total DISCERN score per website type**

| Website types | Total DISCERN score |
|---------------|---------------------|
| Institutional | 56.0 (47.0–58.0)    |
| Commercial    | 39.0 (37.0–43.0)    |
| Charitable    | 53.5 (40.0–62.5)    |
| Support       | 27.0 (24.0–38.0)    |
| Alternative   | 26.0 (22.8–30.0)    |

Values are presented as median (interquartile range).
